# Supplementary material for: Norbornadiene homopolymerization and norbornene/norbornadiene/1-octene terpolymerization by ansa-fluorenylamidotitanium-based catalysts
Source: Royal Society of Chemistry journal article supplement (doi:10.1039/d0py01180k), 2020-01-01
Supplement: d0py01180k1.pdf [file d0py01180k1.pdf]

## Electric Supplementary Information for

### Norbornadiene homopolymerization and norbornene/norbornadiene/1-octene terpolymerization by *ansa*-fluorenylamidotitanium-based catalysts

Hongyi Suo,<sup>a,b,c</sup> Haobo Yuan,<sup>b</sup> Ryo Tanaka,<sup>b</sup> Yuushou Nakayama,<sup>b</sup> Wen-Hua Sun,<sup>\*a,c</sup>  
and Takeshi Shiono<sup>\*b</sup>

<sup>a</sup> Key Laboratory of Engineering Plastics and Beijing National Laboratory for Molecular Sciences, Institute of Chemistry, Chinese Academy of Sciences, Beijing 100190, China

<sup>b</sup> Department of Applied Chemistry, Graduate School of Advanced Science and Engineering, Hiroshima University, Kagamiyama 1-4-1, Higashi-Hiroshima 739-8527, Japan

<sup>c</sup> CAS Research/Education Center for Excellence in Molecular Sciences, University of Chinese Academy of Sciences, Beijing 100049, China

#### Contents

1. **Figure S1** <sup>1</sup>H and <sup>13</sup>C NMR spectra of polyNBD spectrum obtained by **2**-[Ph<sub>3</sub>C][B(C<sub>6</sub>F<sub>5</sub>)<sub>4</sub>] (Run 11, Table 1).
2. **Figure S2** <sup>13</sup>C NMR of poly(NB/NBD/OC) spectrum obtained by **1**-MMAO in 5 min (Run 7, Table 2).
3. **Figure S3** <sup>13</sup>C NMR of terpoly(NB/NBD/OC) spectrum obtained by **1**-MMAO in 10 min (Run 1, Table 2).
4. **Figure S4** <sup>13</sup>C NMR of terpoly(NB/NBD/OC) spectrum obtained by **1**-MMAO in 60 min (Run 8, Table 2).
5. **Figure S5** <sup>13</sup>C NMR of terpoly(NB/NBD/OC) spectrum obtained by **1**-MMAO in 120 min (Run 9, Table 2).
6. **Figure S6** <sup>13</sup>C NMR spectrum of terpoly(NB/NBD/OC) obtained by **1**-[Ph<sub>3</sub>C][B(C<sub>6</sub>F<sub>5</sub>)<sub>4</sub>] at 25 °C (Run 1, Table 3).
7. **Figure S7** <sup>13</sup>C NMR spectrum of terpoly(NB/NBD/OC) obtained by **2**-[Ph<sub>3</sub>C][B(C<sub>6</sub>F<sub>5</sub>)<sub>4</sub>] at 0 °C (Run 3, Table 3).
8. **Figure S8** <sup>13</sup>C NMR spectrum of terpoly(NB/NBD/OC) obtained by **2**-[Ph<sub>3</sub>C][B(C<sub>6</sub>F<sub>5</sub>)<sub>4</sub>] in the ratio of 4.4/1.2/4.4 at 0 °C (Run 6, Table 3).
9. **Table S1** Conversions of comonomers in each catalytic system.

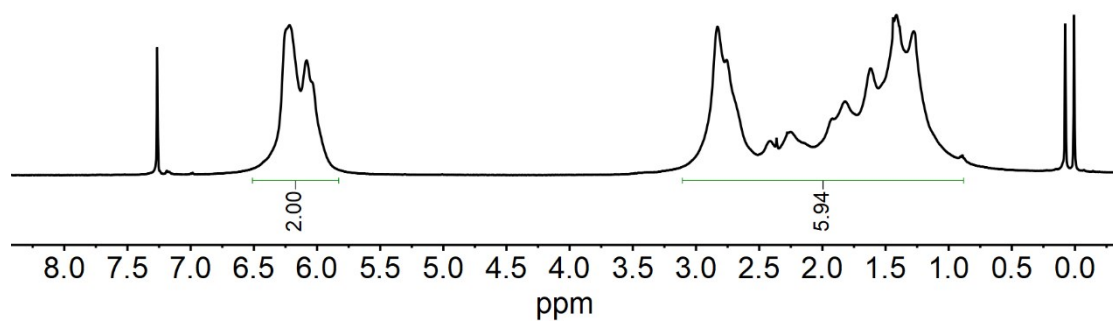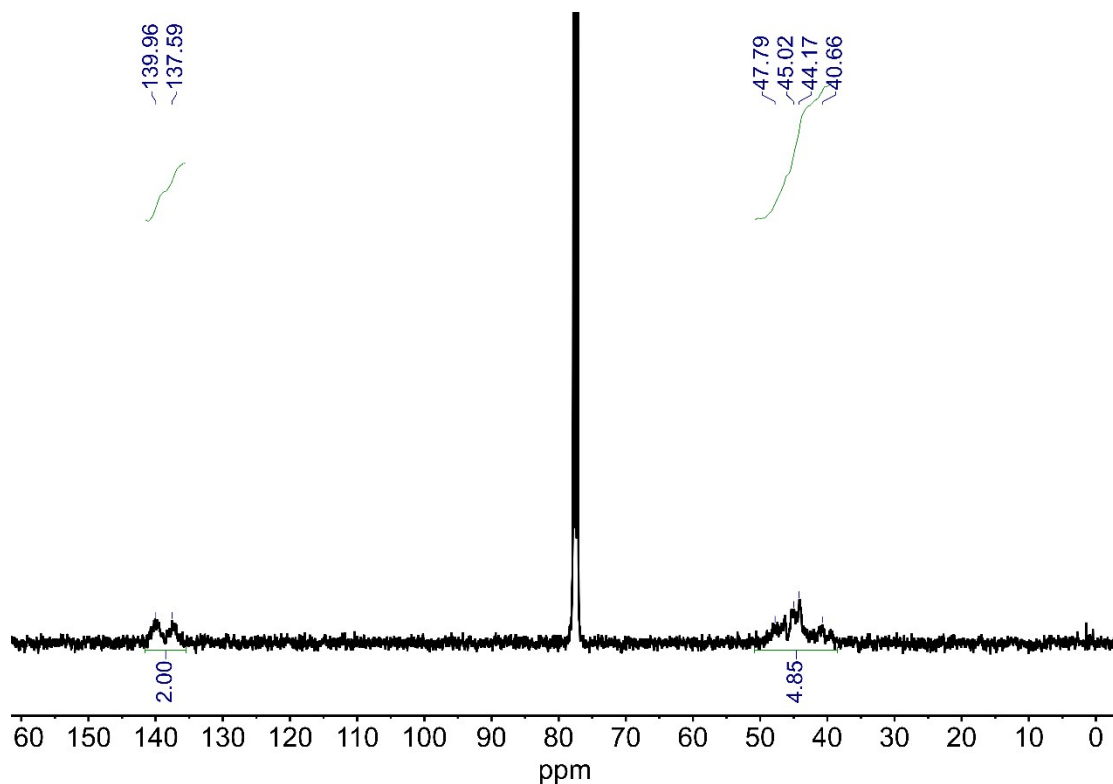

**Figure S1**  $^1\text{H}$  and  $^{13}\text{C}$  NMR spectra of polyNBD obtained by  $2\text{-}[\text{Ph}_3\text{C}][\text{B}(\text{C}_6\text{F}_5)_4]$  (Run 11, Table 1).

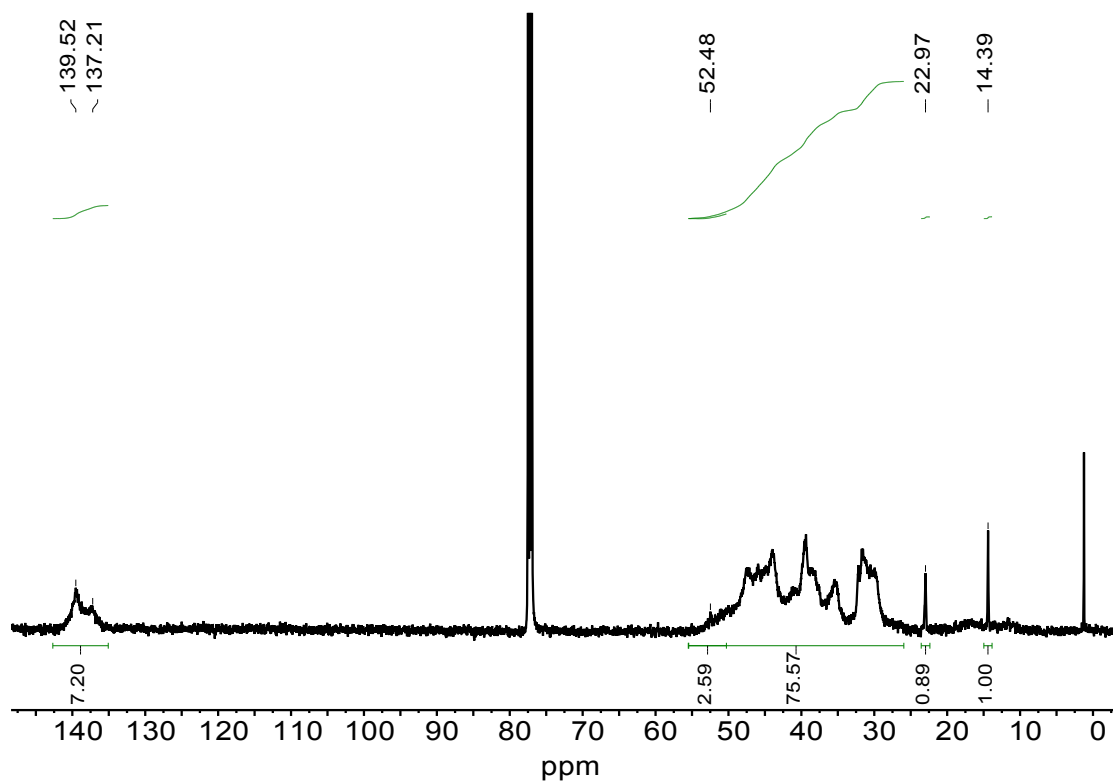

**Figure S2**  $^{13}\text{C}$  NMR spectrum of poly(NB/NBD/OC) obtained by 1-MMAO in 5 min (Run 7, Table 2).

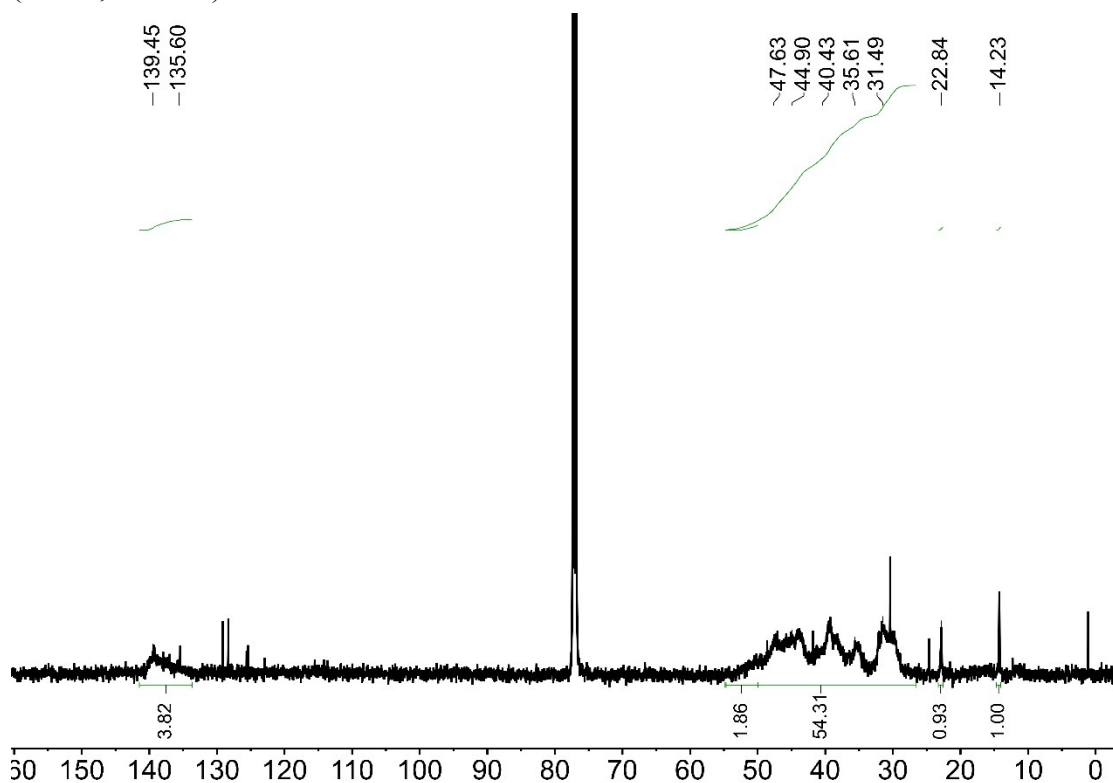

**Figure S3**  $^{13}\text{C}$  NMR spectrum of terpoly(NB/NBD/OC) obtained by 1-MMAO in 10 min (Run 1, Table 2).

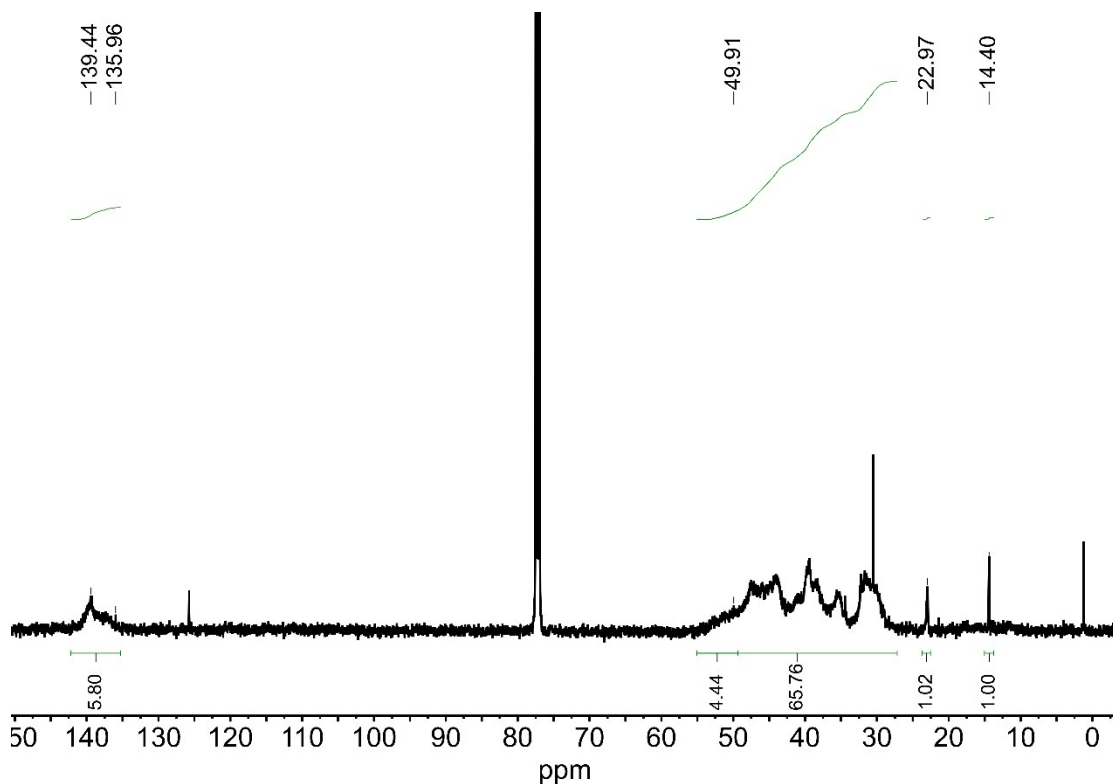

**Figure S4**  $^{13}\text{C}$  NMR spectrum of terpoly(NB/NBD/OC) obtained by 1-MMAO in 60 min (Run 8, Table 2).

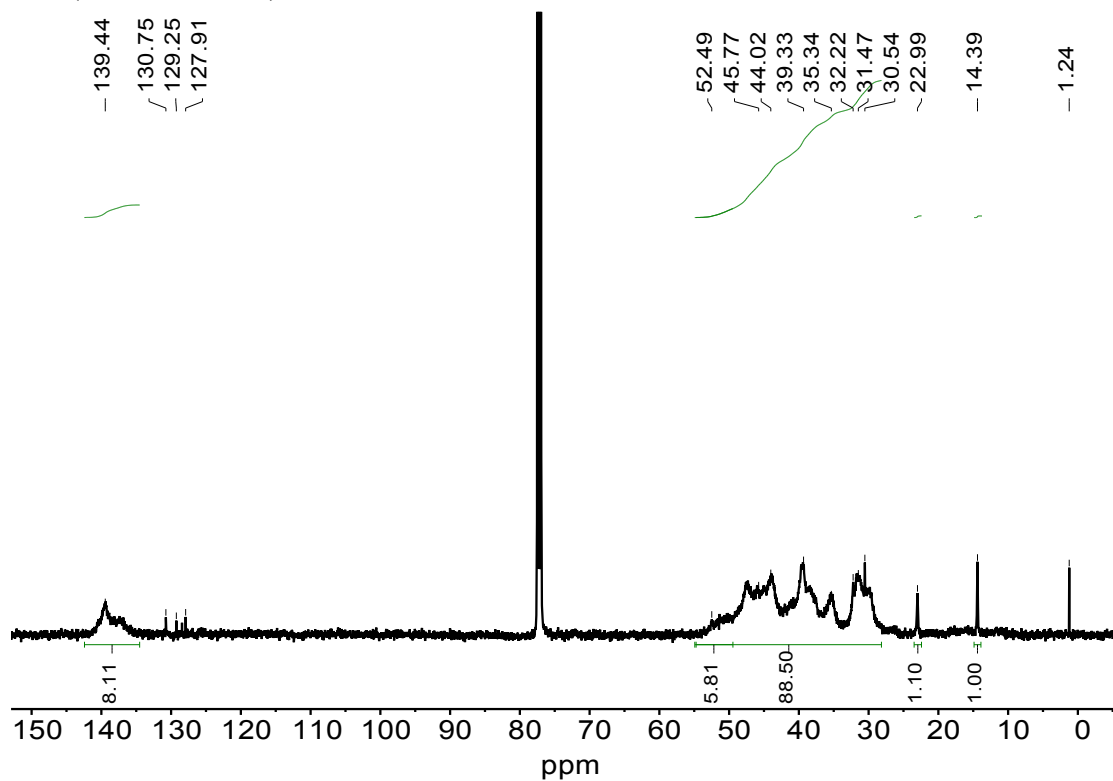

**Figure S5**  $^{13}\text{C}$  NMR spectrum of terpoly(NB/NBD/OC) obtained by 1-MMAO in 120 min (Run 9, Table 2).

I didn't put NMR spectrum of Run 2, Table 3 because it is calculated by solid-state NMR and cannot show the integral clearly. The  $^{13}\text{C}$  NMR spectrum of terpolymer at different times is also not shown, because the spectrum is not very good.

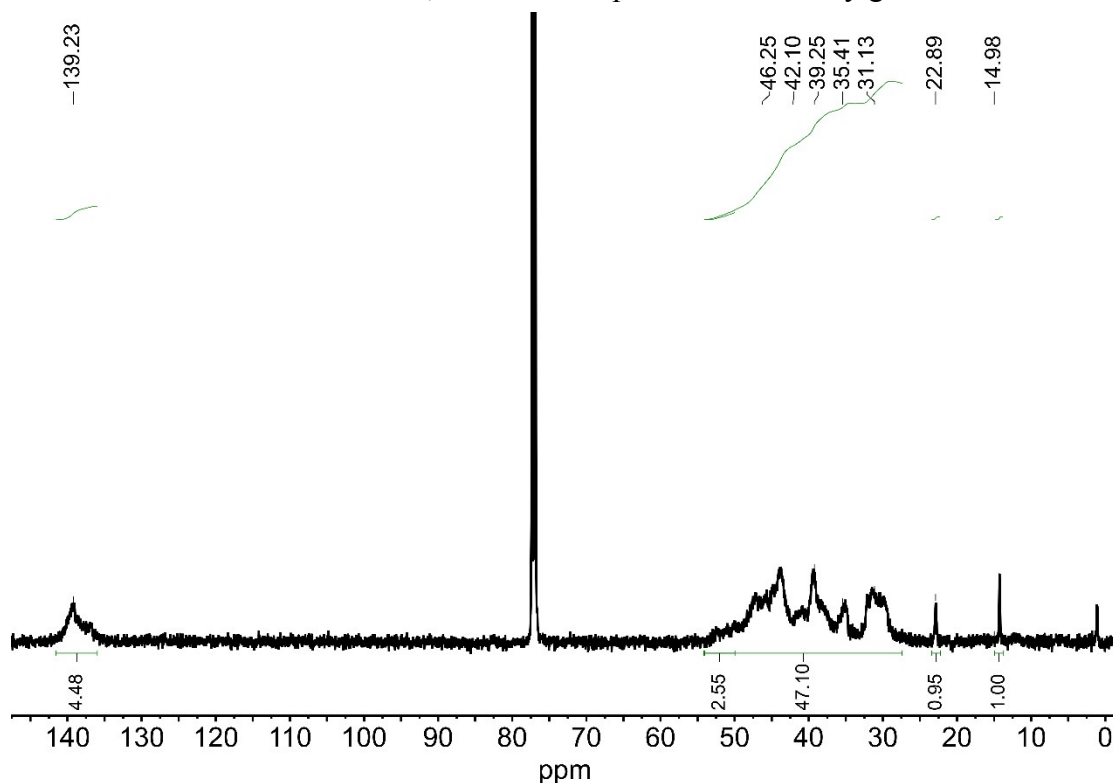

**Figure S6**  $^{13}\text{C}$  NMR spectrum of terpoly(NB/NBD/OC) obtained by 1- $[\text{Ph}_3\text{C}][\text{B}(\text{C}_6\text{F}_5)_4]$  at 25 °C (Run 1, Table 3).

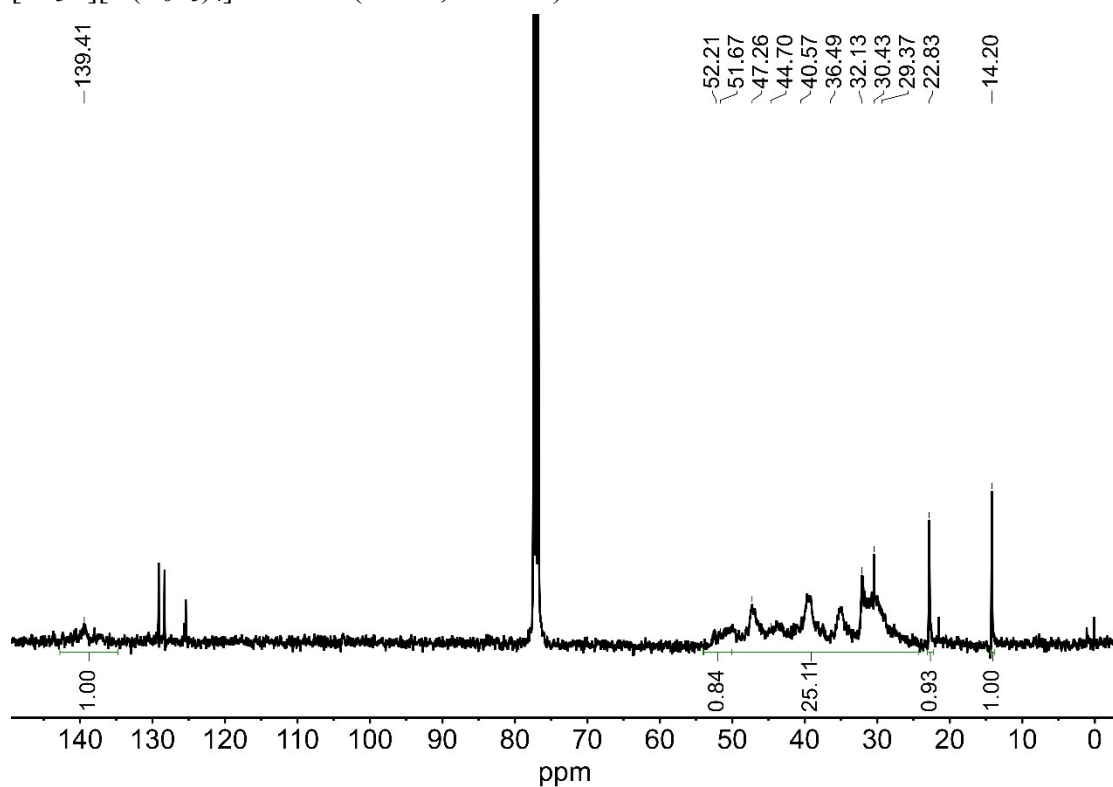

**Figure S7**  $^{13}\text{C}$  NMR spectrum of terpoly(NB/NBD/OC) obtained by 2- $[\text{Ph}_3\text{C}][\text{B}(\text{C}_6\text{F}_5)_4]$  at 25 °C (Run 2, Table 3).

[Ph<sub>3</sub>C][B(C<sub>6</sub>F<sub>5</sub>)<sub>4</sub>] at 0 °C (Run 3, Table 3).

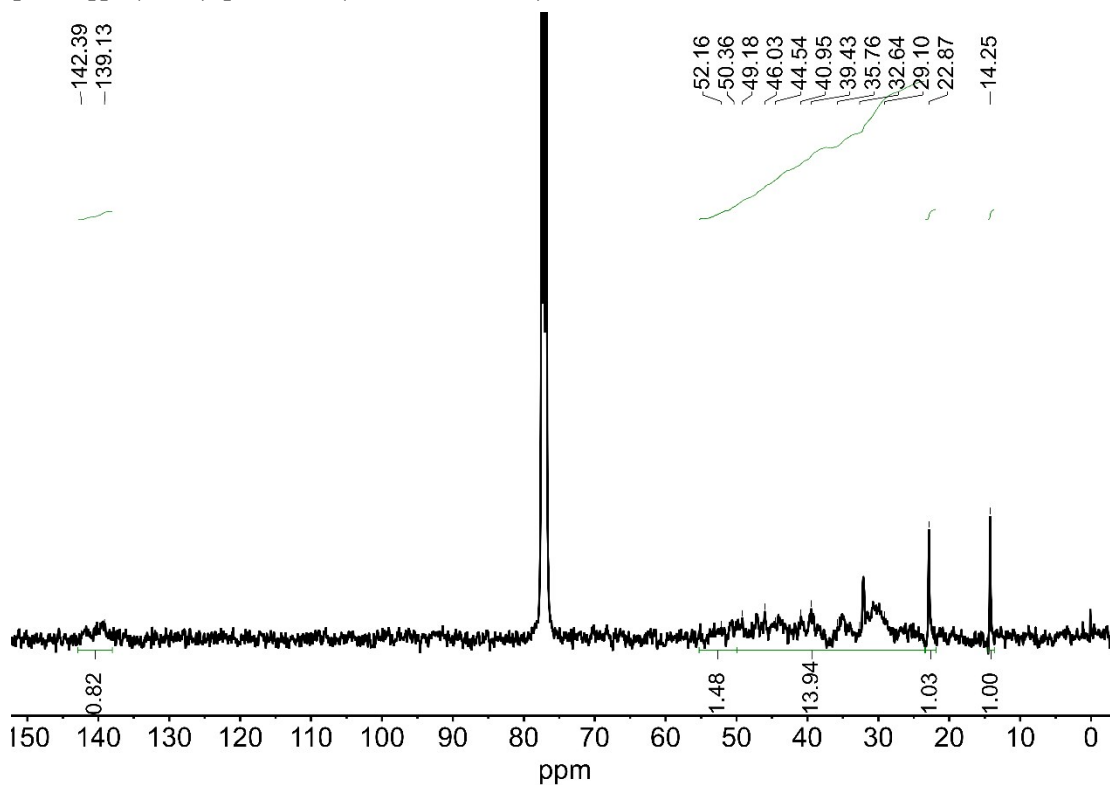

**Figure S8** <sup>13</sup>C NMR spectrum of terpoly(NB/NBD/OC) obtained by 2-[Ph<sub>3</sub>C][B(C<sub>6</sub>F<sub>5</sub>)<sub>4</sub>] in the ratio of 4.4/1.2/4.4 at 0 °C (Run 6, Table 3).

**Table S1** Conversions of comonomers in each catalytic system <sup>a</sup>

| Run           | Cat.     | Co-cat. <sup>b</sup> | Total conv. (%) | Content <sup>c</sup> NB/NBD/OC (mol %) | Conv. <sup>d</sup> NB/NBD/OC (%) |
|---------------|----------|----------------------|-----------------|----------------------------------------|----------------------------------|
| 1 in Table 2  | <b>1</b> | MMAO                 | 21              | 65/24/11                               | 21/31/12                         |
| 12 in Table 2 | <b>2</b> | MMAO                 | 39              | 64/24/12                               | 39/58/24                         |
| 1 in Table 3  | <b>1</b> | Borate               | 11              | 57/30/13                               | 10/20/7.4                        |
| 2 in Table 3  | <b>2</b> | Borate               | 56              | 60/22/18                               | 52/76/52                         |

<sup>a</sup> NB/NBD/OC feed ratio = 66/17/17 (mol %). <sup>b</sup> Borate = [Ph<sub>3</sub>C][B(C<sub>6</sub>F<sub>5</sub>)<sub>4</sub>].

<sup>c</sup> Comonomer contents. <sup>d</sup> Conversion of each comonomer calculated from the polymer mass and the comonomer contents.
